# Supplementary material for: A Data-Driven Approach to High-Volume Recruitment: Application to Student Admission
Source: Atypon-hosted journal article supplement (doi:10.1287/msom.2019.0779), 2019-11-07
Supplement: msom.2019.0779.sm1.pdf [file msom.2019.0779.sm1.pdf]

# A Data-Driven Approach to High-Volume Recruitment: Application to Student Admission

Lilun Du      Qing Li

School of Business and Management

Hong Kong University of Science and Technology

Clear Water Bay, Kowloon

Hong Kong

dulilun@ust.hk      •      imqli@ust.hk

## Proof of Theorem 1

Let  $\|\cdot\|_2$  denote the Frobenius norm of a vector or a matrix. The theorem can be proved in the following three steps.

STEP ONE: As  $\{x_{i1}, i = 1, \dots, m\}$  are independent and identically distributed with mean  $\mu_{x_1}$  and finite variance  $\sigma_{x_1}^2$ , we have  $E(\hat{\mu}_{x_1}) = \mu_{x_1}$  and  $\text{var}(\hat{\mu}_{x_1}) = \sigma_{x_1}^2/m$ . Hence,  $\hat{\mu}_{x_1} - \mu_{x_1} = O_p(\frac{1}{\sqrt{m}})$ . To prove the convergence of  $\hat{\sigma}_{x_1}^2$ , we reformulate it as

$$\hat{\sigma}_{x_1}^2 = \frac{1}{m-1}(x_{11}, \dots, x_{m1})\mathbf{M}(x_{11}, \dots, x_{m1})^\top,$$

where  $\mathbf{M} = \mathbf{I}_{m \times m} - \frac{1}{m}\mathbf{1}_{m \times 1}\mathbf{1}_{m \times 1}^\top$  is the idempotent matrix that  $\mathbf{M} = \mathbf{M}^2$ . Because  $\mathbf{M}$  is a symmetric and real matrix, it is orthogonally diagonalizable and has  $m$  linearly independent eigenvectors. Its eigenvalues are 0 (with multiplicity 1) and 1 (with multiplicity  $m-1$ ). Letting  $\mathbf{v}_1, \mathbf{v}_2, \dots, \mathbf{v}_{m-1}$  be the eigenvectors with eigenvalue 1, then  $z_i = (x_{11}, \dots, x_{m1})\mathbf{v}_i$  are independent random variables with mean zero and variance  $\sigma_{x_1}^2$  (Horn and Johnson 1990). Therefore,

$$\hat{\sigma}_{x_1}^2 - \sigma_{x_1}^2 = \frac{1}{m-1} \sum_{i=1}^{m-1} z_i^2 - \sigma_{x_1}^2 = O_p\left(\frac{1}{\sqrt{m-1}}\right).$$

The proof of Equation (11) is completed.

STEP TWO: From model (5), standard results from linear regression show that

$$\hat{\beta}_0 - \beta_0 = O_p\left(\frac{1}{\sqrt{m_1}}\right), \hat{\beta}_1 - \beta_1 = O_p\left(\frac{1}{\sqrt{m_1}}\right), \text{ and } \hat{\sigma}_{x_2|x_1}^2 - \sigma_{x_2|x_1}^2 = O_p\left(\frac{1}{\sqrt{m_1}}\right).$$

As a result, one can obtain

$$\widehat{\beta}_1^2 - \beta_1^2 = (\widehat{\beta}_1 + \beta_1)(\widehat{\beta}_1 - \beta_1) = (\widehat{\beta}_1 - \beta_1)^2 + 2\beta_1(\widehat{\beta}_1 - \beta_1) = O_p\left(\frac{1}{m_1}\right) + O_p\left(\frac{1}{\sqrt{m_1}}\right) = O_p\left(\frac{1}{\sqrt{m_1}}\right).$$

Using the above results and Equation (6), we can show the convergence of  $\widehat{\mu}_{x_2}$  as follows:

$$\begin{aligned}\widehat{\mu}_{x_2} - \mu_{x_2} &= (\widehat{\beta}_0 - \beta_0) + (\widehat{\beta}_1 \widehat{\mu}_{x_1} - \beta_1 \mu_{x_1}) \\ &= (\widehat{\beta}_0 - \beta_0) + (\widehat{\mu}_{x_1} - \mu_{x_1})(\widehat{\beta}_1 - \beta_1) + \mu_{x_1}(\widehat{\beta}_1 - \beta_1) + \beta_1(\widehat{\mu}_{x_1} - \mu_{x_1}) \\ &= O_p\left(\frac{1}{\sqrt{m_1}}\right) + O_p\left(\frac{1}{\sqrt{mm_1}}\right) + O_p\left(\frac{1}{\sqrt{m_1}}\right) + O_p\left(\frac{1}{\sqrt{m}}\right) = O_p\left(\frac{1}{\sqrt{m_1}}\right).\end{aligned}$$

Similarly,  $\widehat{\sigma}_{x_2}^2 - \sigma_{x_2}^2$  can be bounded by

$$\begin{aligned}\widehat{\sigma}_{x_2}^2 - \sigma_{x_2}^2 &= (\widehat{\beta}_1^2 - \beta_1^2)(\widehat{\sigma}_{x_1}^2 - \sigma_{x_1}^2) + \sigma_{x_1}^2(\widehat{\beta}_1^2 - \beta_1^2) + \beta_1^2(\widehat{\sigma}_{x_1}^2 - \sigma_{x_1}^2) + (\widehat{\sigma}_{x_2|x_1}^2 - \sigma_{x_2|x_1}^2) \\ &= O_p\left(\frac{1}{\sqrt{mm_1}}\right) + O_p\left(\frac{1}{\sqrt{m_1}}\right) + O_p\left(\frac{1}{\sqrt{m}}\right) + O_p\left(\frac{1}{\sqrt{m_1}}\right) = O_p\left(\frac{1}{\sqrt{m_1}}\right).\end{aligned}$$

For the term  $\widehat{\sigma}_{x_1, x_2}$ , similar arguments lead to

$$\widehat{\sigma}_{x_1, x_2} - \sigma_{x_1, x_2} = (\widehat{\sigma}_{x_1}^2 - \sigma_{x_1}^2)(\widehat{\beta}_1 - \beta_1) + \beta_1(\widehat{\sigma}_{x_1}^2 - \sigma_{x_1}^2) + \sigma_{x_1}^2(\widehat{\beta}_1 - \beta_1) = O_p\left(\frac{1}{\sqrt{m_1}}\right).$$

This completes the proof of Equation (12).

STEP THREE: According to model (7), we have

$$\widehat{\gamma}_0 - \gamma_0 = O_p\left(\frac{1}{\sqrt{m_3}}\right), |\widehat{\gamma} - \gamma|_2 = O_p\left(\frac{1}{\sqrt{m_3}}\right), \text{ and } \widehat{\sigma}_{y|x}^2 - \sigma_{y|x}^2 = O_p\left(\frac{1}{\sqrt{m_3}}\right).$$

This implies

$$|\widehat{\gamma}|_2^2 - |\gamma|_2^2 = \|\widehat{\gamma} - \gamma\|_2^2 + 2|\gamma|_2 \times \|\widehat{\gamma} - \gamma\|_2 = O_p\left(\frac{1}{m_3}\right) + O_p\left(\frac{1}{\sqrt{m_3}}\right) = O_p\left(\frac{1}{\sqrt{m_3}}\right).$$

By Equation (10),  $\widehat{\mu}_y$  can be decomposed as

$$\begin{aligned}\widehat{\mu}_y - \mu_y &= (\widehat{\gamma}_0 - \gamma_0) + (\widehat{\boldsymbol{\mu}}_x - \boldsymbol{\mu}_x)^\top (\widehat{\boldsymbol{\gamma}} - \boldsymbol{\gamma}) + (\widehat{\boldsymbol{\mu}}_x - \boldsymbol{\mu}_x)^\top \boldsymbol{\gamma} + \boldsymbol{\mu}_x^\top (\widehat{\boldsymbol{\gamma}} - \boldsymbol{\gamma}) \\ &\leq O_p\left(\frac{1}{\sqrt{m_3}}\right) + |\widehat{\boldsymbol{\mu}}_x - \boldsymbol{\mu}_x|_2 \times |\widehat{\boldsymbol{\gamma}} - \boldsymbol{\gamma}|_2 + |\widehat{\boldsymbol{\mu}}_x - \boldsymbol{\mu}_x|_2 \times |\boldsymbol{\gamma}|_2 + |\boldsymbol{\mu}_x|_2 \times |\widehat{\boldsymbol{\gamma}} - \boldsymbol{\gamma}|_2 \\ &= O_p\left(\frac{1}{\sqrt{m_3}}\right) + O_p\left(\frac{1}{\sqrt{m_1}}\right) \times O_p\left(\frac{1}{\sqrt{m_3}}\right) + O_p\left(\frac{1}{\sqrt{m_1}}\right) + O_p\left(\frac{1}{\sqrt{m_3}}\right) = O_p\left(\frac{1}{\sqrt{m_3}}\right).\end{aligned}$$

Now, we turn to analyze the term  $\widehat{\sigma}_y^2$ . Derivations yield that

$$\begin{aligned}\widehat{\sigma}_y^2 - \sigma_y^2 &= (\widehat{\sigma}_{y|x}^2 - \sigma_{y|x}^2) + \widehat{\boldsymbol{\gamma}}^\top \widehat{\boldsymbol{\Sigma}}_x \widehat{\boldsymbol{\gamma}} - \boldsymbol{\gamma}^\top \boldsymbol{\Sigma}_x \boldsymbol{\gamma} \\ &= O_p\left(\frac{1}{\sqrt{m_3}}\right) + \widehat{\boldsymbol{\gamma}}^\top (\widehat{\boldsymbol{\Sigma}}_x - \boldsymbol{\Sigma}_x) \widehat{\boldsymbol{\gamma}} + \widehat{\boldsymbol{\gamma}}^\top \boldsymbol{\Sigma}_x \widehat{\boldsymbol{\gamma}} - \boldsymbol{\gamma}^\top \boldsymbol{\Sigma}_x \boldsymbol{\gamma}\end{aligned}$$

$$\begin{aligned}
&\leq O_p\left(\frac{1}{\sqrt{m_3}}\right) + O_p\left(\frac{1}{\sqrt{m_1}}\right) + \lambda_{\max}(\mathbf{\Sigma}_{\mathbf{x}}) \left| |\hat{\gamma}|_2^2 - |\gamma|_2^2 \right| \\
&= O_p\left(\frac{1}{\sqrt{m_3}}\right) + O_p\left(\frac{1}{\sqrt{m_1}}\right) + O_p\left(\frac{1}{\sqrt{m_3}}\right) = O_p\left(\frac{1}{\sqrt{m_3}}\right),
\end{aligned}$$

where  $\lambda_{\max}(\mathbf{\Sigma}_{\mathbf{x}})$  is the largest eigenvalue of  $\mathbf{\Sigma}_{\mathbf{x}}$ . Finally, we show that  $\hat{\sigma}_{y,x_1}$  and  $\hat{\sigma}_{y,x_2}$  converge to their respective true values in probability. Let  $\hat{\gamma}_1$  and  $\hat{\gamma}_2$  be the estimators of  $\gamma_1$  and  $\gamma_2$ , respectively. Thus,  $\hat{\sigma}_{y,x_1} = \hat{\sigma}_{x_1}^2 \hat{\gamma}_1 + \hat{\sigma}_{x_1,x_2} \hat{\gamma}_2$  converges to  $\sigma_{y,x_1}$  at the rate of  $O_p\left(\frac{1}{\sqrt{m_3}}\right)$ , that is  $|\hat{\sigma}_{y,x_1} - \sigma_{y,x_1}| = O_p\left(\frac{1}{\sqrt{m_3}}\right)$ . Analogously,  $|\hat{\sigma}_{y,x_2} - \sigma_{y,x_2}| = O_p\left(\frac{1}{\sqrt{m_3}}\right)$ . Equation (13) hence follows.

**Proof of Theorem 2** For ease of presentation, denote  $a_m = O(b_m)$  if there exists a finite constant  $C$  such that  $|a_m| \leq C|b_m|$ , for all  $m$ . From Theorem 1, we have

$$|\hat{\boldsymbol{\mu}}_{\mathbf{x},y} - \boldsymbol{\mu}_{\mathbf{x},y}|_2 = O_p\left(\frac{1}{\sqrt{m_3}}\right), \text{ and } |\hat{\boldsymbol{\Sigma}}_{\mathbf{x},y} - \boldsymbol{\Sigma}_{\mathbf{x},y}|_2 = O_p\left(\frac{1}{\sqrt{m_3}}\right), \quad (\text{A.1})$$

where  $\hat{\boldsymbol{\mu}}_{\mathbf{x},y}$  and  $\hat{\boldsymbol{\Sigma}}_{\mathbf{x},y}$  are the mean and variance estimators obtained via the regression-based moment estimation approach. To facilitate the derivation, we transform the vector  $(x_1, x_2, y)^\top$  to  $\boldsymbol{\omega} = (x_1, x_1 + x_2, y)$  using the transformation matrix  $\mathbf{M}_1 = \{x_{ij}\}_{3 \times 3}$ , where  $x_{ij} = 1$  for  $(i, j) = \{(1, 1), (2, 2), (3, 3), (2, 1)\}$  and  $x_{ij} = 0$  otherwise. As a result,  $\boldsymbol{\omega}$  follows a multivariate normal distribution with mean  $\boldsymbol{\mu}_{\boldsymbol{\omega}} = \mathbf{M}_1 \boldsymbol{\mu}_{\mathbf{x},y}$  and covariance matrix  $\boldsymbol{\Sigma}_{\boldsymbol{\omega}} = \mathbf{M}_1 \boldsymbol{\Sigma}_{\mathbf{x},y} \mathbf{M}_1^\top$ . Denote by  $\hat{\boldsymbol{\mu}}_{\boldsymbol{\omega}}$  and  $\hat{\boldsymbol{\Sigma}}_{\boldsymbol{\omega}}$  their corresponding estimators. By (A.1), we can have  $|\hat{\boldsymbol{\mu}}_{\boldsymbol{\omega}} - \boldsymbol{\mu}_{\boldsymbol{\omega}}|_2 = O_p\left(\frac{1}{\sqrt{m_3}}\right)$  and  $|\hat{\boldsymbol{\Sigma}}_{\boldsymbol{\omega}} - \boldsymbol{\Sigma}_{\boldsymbol{\omega}}|_2 = O_p\left(\frac{1}{\sqrt{m_3}}\right)$ .

To show the consistency of  $\widehat{\Pr}(y > \hat{c}_3 \mid \{x_1 < \hat{c}_1\} \cup \{x_1 > \hat{c}_1, x_1 + x_2 < \hat{c}_2\})$ , we first use the multivariate normal distribution to derive a specific form for  $\Pr(y > c_3 \mid \{x_1 < c_1\} \cup \{x_1 > c_1, x_1 + x_2 < c_2\})$ , that is

$$\begin{aligned}
&\frac{\Pr(y > c_3 \mid \{x_1 < c_1\} \cup \{x_1 > c_1, x_1 + x_2 < c_2\})}{\Pr(y > c_3) - \Pr(y > c_3, x_1 + x_2 > c_2, x_1 > c_1)} \\
&= \frac{1 - \Pr(x_1 + x_2 > c_2, x_1 > c_1)}{\Pr(\omega_3 > c_3) - \Pr(\omega_3 > c_3, \omega_2 > c_2, \omega_1 > c_1)} \\
&= \frac{1 - \Pr(\omega_2 > c_2, \omega_1 > c_1)}{\int_{c_3}^{\infty} \phi_1(\omega_3; \mu_3, \sigma_3) d\omega_3 - \int_{c_3}^{\infty} \int_{c_2}^{\infty} \int_{c_1}^{\infty} \phi_{123}(\boldsymbol{\omega}; \boldsymbol{\mu}_{\boldsymbol{\omega}}, \boldsymbol{\Sigma}_{\boldsymbol{\omega}}) d\boldsymbol{\omega}} \\
&= \frac{\int_{c_3}^{\infty} \phi_1(\omega_3; \mu_3, \sigma_3) d\omega_3 - \int_{c_3}^{\infty} \int_{c_2}^{\infty} \int_{c_1}^{\infty} \phi_{123}(\boldsymbol{\omega}; \boldsymbol{\mu}_{\boldsymbol{\omega}}, \boldsymbol{\Sigma}_{\boldsymbol{\omega}}) d\boldsymbol{\omega}}{1 - \int_{c_2}^{\infty} \int_{c_1}^{\infty} \phi_{12}(\omega_1, \omega_2; \boldsymbol{\mu}_{\boldsymbol{\omega}}, \boldsymbol{\Sigma}_{\boldsymbol{\omega}}) d\omega_1 d\omega_2}, \quad (\text{A.2})
\end{aligned}$$

where  $\phi_1$ ,  $\phi_{12}$ , and  $\phi_{123}$  are the density functions of  $\omega_3$ ,  $(\omega_1, \omega_2)^\top$ , and  $\boldsymbol{\omega}$ , respectively. From (A.2),  $\widehat{\Pr}(y > \hat{c}_3 \mid \{x_1 < \hat{c}_1\} \cup \{x_1 > \hat{c}_1, x_1 + x_2 < \hat{c}_2\})$  can be similarly formulated, with  $\boldsymbol{\mu}_{\boldsymbol{\omega}}$ ,  $\boldsymbol{\Sigma}_{\boldsymbol{\omega}}$ , and  $(c_1, c_2, c_3)^\top$  replaced by  $\hat{\boldsymbol{\mu}}_{\boldsymbol{\omega}}$ ,  $\hat{\boldsymbol{\Sigma}}_{\boldsymbol{\omega}}$ , and  $(\hat{c}_1, \hat{c}_2, \hat{c}_3)^\top$ , respectively. As the density functions of normal random variables are exponentially smooth, it immediately follows from

the continuous mapping theorem (see Theorem 2.3 in Van der Vaart 1998) that

$$\begin{aligned} & \left| \widehat{\Pr}(y > \widehat{c}_3 \mid \{x_1 < \widehat{c}_1\} \cup \{x_1 > \widehat{c}_1, x_1 + x_2 < \widehat{c}_2\}) - \Pr(y > c_3 \mid \{x_1 < c_1\} \cup \{x_1 > c_1, x_1 + x_2 < c_2\}) \right| \\ & \leq O(|\widehat{\boldsymbol{\mu}}_{\boldsymbol{\omega}} - \boldsymbol{\mu}_{\boldsymbol{\omega}}|_2 + |\widehat{\boldsymbol{\Sigma}}_{\boldsymbol{\omega}} - \boldsymbol{\Sigma}_{\boldsymbol{\omega}}|_2 + |\widehat{c}_1 - c_1| + |\widehat{c}_2 - c_2| + |\widehat{c}_3 - c_3|) \\ & = O_p\left(\frac{1}{\sqrt{m_3}}\right) + O(|\widehat{c}_1 - c_1| + |\widehat{c}_2 - c_2| + |\widehat{c}_3 - c_3|). \end{aligned}$$

Now we derive the convergence rate of  $\widehat{c}_1$ ,  $\widehat{c}_2$ , and  $\widehat{c}_3$ . From Equations (17) and (18),  $\widehat{c}_i - c_i = O(|\widehat{\boldsymbol{\mu}}_{\boldsymbol{\omega}} - \boldsymbol{\mu}_{\boldsymbol{\omega}}|_2 + |\widehat{\boldsymbol{\Sigma}}_{\boldsymbol{\omega}} - \boldsymbol{\Sigma}_{\boldsymbol{\omega}}|_2) = O_p(\frac{1}{\sqrt{m_3}})$ , for  $i = 1, 2$ . Similarly, from Equation (19), we have

$$|\widehat{c}_3 - c_3| = O(|\widehat{\boldsymbol{\mu}}_{\boldsymbol{\omega}} - \boldsymbol{\mu}_{\boldsymbol{\omega}}|_2 + |\widehat{\boldsymbol{\Sigma}}_{\boldsymbol{\omega}} - \boldsymbol{\Sigma}_{\boldsymbol{\omega}}|_2) + O(|\widehat{\varphi}_0 - \varphi_0| + |\widehat{\boldsymbol{\varphi}} - \boldsymbol{\varphi}|_2).$$

Under the logistic regression model (20), one can show that  $O(|\widehat{\varphi}_0 - \varphi_0| + |\widehat{\boldsymbol{\varphi}} - \boldsymbol{\varphi}|_2) = O_p(\frac{1}{\sqrt{m_2}})$ . This completes the proof of Theorem 2.

**Proof of Theorem 3** Throughout the proofs, we use the generic notation  $f_X(\cdot)$  to denote the density function of any generic random variable  $X$ . We shall prove that under the random yield assumption,  $c_3$  as a function of  $\boldsymbol{\theta}$  achieves its maximum when  $\boldsymbol{\theta}$  is proportional to  $\boldsymbol{\gamma}$ . For ease of notation, we reformulate the models (5) and (7) as

$$x_2 = \beta_0 + \beta_1 x_1 + \widetilde{x}_2, y = (\gamma_0 + \gamma_2 \beta_0) + (\gamma_1 + \gamma_2 \beta_1) x_1 + \gamma_2 \widetilde{x}_2 + \widetilde{y}, \quad (\text{A.3})$$

where  $x_1$ ,  $\widetilde{x}_2$ , and  $\widetilde{y}$  are independent. Let  $\gamma_0^* = \gamma_0 + \gamma_2 \beta_0$ ,  $\gamma_1^* = \gamma_1 + \gamma_2 \beta_1$ .

Under the random yield assumption, given  $q_1$ ,  $q_2$ , and  $q_3$ ,  $c_3$  as a function of  $\boldsymbol{\theta}$  can be sequentially solved from (17) to (19)

$$q_1 = \Pr(x_1 > c_1), q_2 q_1 = \Pr(\mathbf{x}^\top \boldsymbol{\theta} > c_2, x_1 > c_1), q_3 q_2 q_1 = \Pr(y > c_3, \mathbf{x}^\top \boldsymbol{\theta} > c_2, x_1 > c_1).$$

Without loss of generality, we assume  $\theta_2 > 0$ . Taking derivatives with respect to  $\boldsymbol{\theta}$  for the above second equation leads to

$$\int_{c_1}^{\infty} \left( \frac{\partial c_2}{\partial \theta_1} - x_1 \right) f_{\widetilde{x}_2}(l(x_1)) f_{x_1}(x_1) dx_1 = 0, \int_{c_1}^{\infty} \left( \frac{\partial c_2}{\partial \theta_2} \theta_2 - c_2 + \theta_1 x_1 \right) f_{\widetilde{x}_2}(l(x_1)) f_{x_1}(x_1) dx_1 = 0,$$

where  $l(x_1) = \frac{c_2 - \theta_0^* - \theta_1^* x_1}{\theta_2}$  with  $\theta_0^* = \beta_0 \theta_2$  and  $\theta_1^* = \theta_1 + \beta_1 \theta_2$ . Accordingly,  $c_2$  as a function of  $\boldsymbol{\theta}$  can be solved via

$$\frac{\partial c_2}{\partial \theta_1} = \frac{\int_{c_1}^{\infty} x_1 f_{\widetilde{x}_2}(l(x_1)) f_{x_1}(x_1) dx_1}{\int_{c_1}^{\infty} f_{\widetilde{x}_2}(l(x_1)) f_{x_1}(x_1) dx_1}, \frac{\partial c_2}{\partial \theta_2} \theta_2 - c_2 = -\theta_1 \times \frac{\int_{c_1}^{\infty} x_1 f_{\widetilde{x}_2}(l(x_1)) f_{x_1}(x_1) dx_1}{\int_{c_1}^{\infty} f_{\widetilde{x}_2}(l(x_1)) f_{x_1}(x_1) dx_1}.$$

Similarly,  $c_3$  as a function of  $\boldsymbol{\theta}$  can be expressed analogously as

$$\begin{aligned}
& -\frac{\partial c_3}{\partial \theta_1} \int_{c_1}^{\infty} \int_{l(x_1)}^{\infty} f_{\tilde{y}}(c_3 - \gamma_0^* - \gamma_1^* x_1 - \gamma_2 \tilde{x}_2) f_{\tilde{x}_2}(l(x_1)) f_{x_1}(x_1) d\tilde{x}_2 dx_1 \\
= & \int_{c_1}^{\infty} \left( \frac{\partial c_2}{\partial \theta_1} - x_1 \right) / \theta_2 \{1 - F_{\tilde{y}}(k(\theta_1, \theta_2))\} f_{\tilde{x}_2}(l(x_1)) f_{x_1}(x_1) dx_1 \text{ and} \\
& -\frac{\partial c_3}{\partial \theta_2} \int_{c_1}^{\infty} \int_{l(x_1)}^{\infty} f_{\tilde{y}}(c_3 - \gamma_0^* - \gamma_1^* x_1 - \gamma_2 \tilde{x}_2) f_{\tilde{x}_2}(l(x_1)) f_{x_1}(x_1) d\tilde{x}_2 dx_1 \\
= & \int_{c_1}^{\infty} \left( \frac{\partial c_2}{\partial \theta_2} \theta_2 - c_2 + \theta_1 x_1 \right) / \theta_2^2 \{1 - F_{\tilde{y}}(k(\theta_1, \theta_2))\} f_{\tilde{x}_2}(l(x_1)) f_{x_1}(x_1) dx_1,
\end{aligned}$$

where  $k(\theta_1, \theta_2) = c_3 - \gamma_0^* - \gamma_1^* x_1 - \gamma_2 \frac{c_2 - \theta_0^* - \theta_1^* x_1}{\theta_2}$  and  $F_{\tilde{y}}(\cdot)$  is the cumulative distribution function of  $\tilde{y}$  in (A.3). Consequently,  $\frac{\partial c_3}{\partial \theta_1}$  is proportional to (up to a negative constant)

$$\begin{aligned}
& \int_{c_1}^{\infty} x_1 f_{\tilde{x}_2}(l(x_1)) f_{x_1}(x_1) dx_1 \int_{c_1}^{\infty} \{1 - F_{\tilde{y}}(k(\theta_1, \theta_2))\} f_{\tilde{x}_2}(l(x_1)) f_{x_1}(x_1) dx_1 \\
& - \int_{c_1}^{\infty} f_{\tilde{x}_2}(l(x_1)) f_{x_1}(x_1) dx_1 \int_{c_1}^{\infty} x_1 \{1 - F_{\tilde{y}}(k(\theta_1, \theta_2))\} f_{\tilde{x}_2}(l(x_1)) f_{x_1}(x_1) dx_1. \quad (\text{A.4})
\end{aligned}$$

Let  $\tilde{f}_{x_1}(x_1) \equiv f_{\tilde{x}_2}(l(x_1)) f_{x_1}(x_1) / \int_{c_1}^{\infty} f_{\tilde{x}_2}(l(x_1)) f_{x_1}(x_1) dx_1$  be a density function. Then, (A.4) can be written in terms of expectation as

$$E_{\tilde{f}_{x_1}} [x_1] E_{\tilde{f}_{x_1}} [\{1 - F_{\tilde{y}}(k(\theta_1, \theta_2))\}] - E_{\tilde{f}_{x_1}} [x_1 \{1 - F_{\tilde{y}}(k(\theta_1, \theta_2))\}]. \quad (\text{A.5})$$

Note that  $k(\theta_1, \theta_2)$  is independent of  $x_1$  if  $\gamma_2 \frac{\theta_1}{\theta_2} - \gamma_1 = 0$ . The condition  $\gamma_2 \frac{\theta_1}{\theta_2} - \gamma_1 = 0$  implies that  $\boldsymbol{\theta}$  is proportional to  $\boldsymbol{\gamma}$ , denoted by  $\boldsymbol{\theta} \propto \boldsymbol{\gamma}$ . Thus, when  $\boldsymbol{\theta} \propto \boldsymbol{\gamma}$ , (A.5) = 0 and  $\frac{\partial c_3}{\partial \theta_1} = 0$ . The same conclusion holds for  $\frac{\partial c_3}{\partial \theta_2}$ , that is,

$$\frac{\partial c_3}{\partial \theta_2} \propto \theta_1 \times \left\{ E_{\tilde{f}_{x_1}} [x_1] E_{\tilde{f}_{x_1}} [\{1 - F_{\tilde{y}}(k(\theta_1, \theta_2))\}] - E_{\tilde{f}_{x_1}} [x_1 \{1 - F_{\tilde{y}}(k(\theta_1, \theta_2))\}] \right\},$$

which equals zero when  $\boldsymbol{\theta} \propto \boldsymbol{\gamma}$ .

For any given  $\theta_2 > 0$ , it holds that  $k(\theta_1, \theta_2)$  is an increasing function of  $x_1$  when  $\gamma_2 \frac{\theta_1}{\theta_2} > \gamma_1$ . Hence, by Chebyshev's sum inequality, (A.5)  $> 0$ . On the other hand, (A.5)  $< 0$  when  $\gamma_2 \frac{\theta_1}{\theta_2} < \gamma_1$  for any given  $\theta_2 > 0$ . By condition  $\gamma_2 / \theta_2 > 0$ , we have  $\gamma_2 > 0$  when  $\theta_2 > 0$ . Thus, it holds that for any given  $\theta_2 > 0$ ,  $c_3(\theta_1, \theta_2)$  achieves its maximum when  $\theta_1 = \gamma_1 \theta_2 / \gamma_2$ . Now consider the function  $c_3(\gamma_1 \theta_2 / \gamma_2, \theta_2)$ . Taking derivative with respect to  $\theta_2$  yields that

$$\frac{dc_3(\gamma_1 \theta_2 / \gamma_2, \theta_2)}{d\theta_2} = \frac{\gamma_1}{\gamma_2} \times \frac{\partial c_3(\theta_1, \theta_2)}{\partial \theta_1} \Bigg|_{\theta_1 = \gamma_1 \theta_2 / \gamma_2} + \frac{\partial c_3(\gamma_1 \theta_2 / \gamma_2, \theta_2)}{\partial \theta_2} = 0.$$

As a result,  $c_3(\boldsymbol{\theta})$  achieves its maximum when  $\boldsymbol{\theta} \propto \boldsymbol{\gamma}$ .

Now we verify the error function achieves its minimum when  $\boldsymbol{\theta} \propto \boldsymbol{\gamma}$ . Under the random yield assumption, the error rate can be simplified as

$$\Pr(y > c_3 \mid \{x_1 < c_1\} \cup \{x_1 > c_1, \mathbf{x}^\top \boldsymbol{\theta} < c_2\}) = \frac{\Pr(y > c_3)}{1 - q_1 q_2} - \frac{q_1 q_2 q_3}{1 - q_1 q_2},$$

which is an decreasing function  $c_3$ . This together with the result for  $c_3(\boldsymbol{\theta})$  yields that the error rate achieves its minimum when  $\boldsymbol{\theta} \propto \boldsymbol{\gamma}$ .

**Proof of Theorem 4** To simplify the presentation, we first prove the result when  $\boldsymbol{\theta} = \mathbf{1}$ . Recall that the error rate is defined as  $\Pr(y > c_3 \mid \{x_1 < c_1\} \cup \{x_1 > c_1, x_1 + x_2 < c_2\})$ . Because the intake target  $Q$  is given, a fixed percentage of shortlisted candidates must be accepted. This amounts to fixing  $q_1 q_2$  when solving  $c_2$  from  $\Pr(x_1 > c_1, x_1 + x_2 > c_2) = q_1 q_2$ . From the logistic regression model (20),  $c_3$  can be solved directly from  $\Pr(y > c_3 \mid \delta = 1, x_1 + x_2 > c_2, x_1 > c_1) = q_3$ , given  $c_1$  and  $c_2$ .

To show that  $\Pr(y > c_3 \mid \{x_1 < c_1\} \cup \{x_1 > c_1, x_1 + x_2 < c_2\})$  is an increasing function with respect to  $c_1$ , we first verify that  $\frac{\partial c_3}{\partial c_1} < 0$ .

According to the condition  $\Pr(x_1 + x_2 > c_2, x_1 > c_1) = q_1 q_2$ , it holds that

$$\int_{c_1}^{\infty} \int_{c_2 - \beta_0 - (1 + \beta_1)x_1}^{\infty} f_{\tilde{x}_2}(\tilde{x}_2) f_{x_1}(x_1) d\tilde{x}_2 dx_1 = q_1 q_2,$$

where  $\tilde{x}_2$  is defined in (A.3). By taking the first-order derivative of the above equation with respect to  $c_1$ , we obtain

$$\frac{\partial c_2}{\partial c_1} = -\frac{\int_{c_2 - \beta_0 - (1 + \beta_1)c_1}^{\infty} f_{\tilde{x}_2}(\tilde{x}_2) d\tilde{x}_2 \times f_{x_1}(c_1)}{\int_{c_1}^{\infty} f_{\tilde{x}_2}(c_2 - \beta_0 - (1 + \beta_1)x_1) f_{x_1}(x_1) dx_1} < 0. \quad (\text{A.6})$$

(A.6) implies that  $c_2$  decreases when  $c_1$  increases. Moreover, (A.6) is equivalent to

$$\int_{-\infty}^{c_1} f_{\tilde{x}_2}(c_2 - \beta_0 - (1 + \beta_1)x_1) (1 + \beta_1) dx_1 \times f_{x_1}(c_1) = -\frac{\partial c_2}{\partial c_1} \int_{c_1}^{\infty} f_{\tilde{x}_2}(c_2 - \beta_0 - (1 + \beta_1)x_1) f_{x_1}(x_1) dx_1,$$

which equals

$$\begin{aligned} & \int_0^{\infty} f_{\tilde{x}_2}(c_2 - \beta_0 - (1 + \beta_1)(-x_1 + c_1)) (1 + \beta_1) dx_1 \times f_{x_1}(c_1) \\ &= -\frac{\partial c_2}{\partial c_1} \int_0^{\infty} f_{\tilde{x}_2}(c_2 - \beta_0 - (1 + \beta_1)(x_1 + c_1)) f_{x_1}(x_1 + c_1) dx_1, \end{aligned} \quad (\text{A.7})$$

by changing the lower and upper limits of the integral.

For notational simplicity, model (20) is reparameterized by

$$\Pr(\delta = 1 \mid x_1, x_2) = \frac{1}{1 + \exp\{-\varphi_0^* - \varphi_1^* x_1 - \varphi_2^* \tilde{x}_2\}}$$

with  $\varphi_0^* = \varphi_0 + \varphi_2\beta_0$  and  $\varphi_1^* = \varphi_1 + \varphi_2\beta_1$ . Then the condition that  $\Pr(y > c_3 \mid \delta = 1, x_1 + x_2 > c_2, x_1 > c_1) = q_3$  can be expressed as

$$\begin{aligned} & \int_{c_1}^{\infty} \int_{c_2 - \beta_0 - (1 + \beta_1)x_1}^{\infty} [1 - F_{\tilde{y}}(c_3 - \gamma_0^* - \gamma_1^*x_1 - \gamma_2\tilde{x}_2)] \frac{1}{1 + \exp\{-\varphi_0^* - \varphi_1^*x_1 - \varphi_2\tilde{x}_2\}} f_{\tilde{x}_2}(\tilde{x}_2) f_{x_1}(x_1) d\tilde{x}_2 dx_1 \\ &= q_3 \int_{c_1}^{\infty} \int_{c_2 - \beta_0 - (1 + \beta_1)x_1}^{\infty} \frac{1}{1 + \exp\{-\varphi_0^* - \varphi_1^*x_1 - \varphi_2\tilde{x}_2\}} f_{\tilde{x}_2}(\tilde{x}_2) f_{x_1}(x_1) d\tilde{x}_2 dx_1, \end{aligned} \quad (\text{A.8})$$

where  $\tilde{y}$  is defined in (A.3). Taking derivatives from both sides with respect to  $c_1$  results in

$$\begin{aligned} & -\frac{\partial c_3}{\partial c_1} \int_{c_1}^{\infty} \int_{c_2 - \beta_0 - (1 + \beta_1)x_1}^{\infty} f_{\tilde{y}}(c_3 - \gamma_0^* - \gamma_1^*x_1 - \gamma_2\tilde{x}_2) \frac{1}{1 + \exp\{-\varphi_0^* - \varphi_1^*x_1 - \varphi_2\tilde{x}_2\}} f_{\tilde{x}_2}(\tilde{x}_2) f_{x_1}(x_1) d\tilde{x}_2 dx_1 \\ &= \int_{c_2 - \beta_0 - (1 + \beta_1)c_1}^{\infty} [1 - q_3 - F_{\tilde{y}}(c_3 - \gamma_0^* - \gamma_1^*c_1 - \gamma_2\tilde{x}_2)] \frac{1}{1 + \exp\{-\varphi_0^* - \varphi_1^*c_1 - \varphi_2\tilde{x}_2\}} f_{\tilde{x}_2}(\tilde{x}_2) d\tilde{x}_2 \times f_{x_1}(c_1) \\ &+ \frac{\partial c_2}{\partial c_1} \int_{c_1}^{\infty} [1 - q_3 - F_{\tilde{y}}(c_3 - \gamma_0^* - \gamma_1^*x_1 - \gamma_2\{c_2 - \beta_0 - (1 + \beta_1)x_1\})] \\ &\times \frac{1}{1 + \exp\{-\varphi_0^* - \varphi_1^*x_1 - \varphi_2(c_2 - \beta_0 - (1 + \beta_1)x_1)\}} f_{\tilde{x}_2}(c_2 - \beta_0 - (1 + \beta_1)x_1) f_{x_1}(x_1) dx_1. \end{aligned}$$

The right hand side can be derived as

$$\begin{aligned} & \int_{-\infty}^{c_1} [1 - q_3 - F_{\tilde{y}}(c_3 - \gamma_0^* - \gamma_1^*c_1 - \gamma_2\{c_2 - \beta_0 - (1 + \beta_1)x_1\})] \\ & \frac{1}{1 + \exp\{-\varphi_0^* - \varphi_1^*c_1 - \varphi_2\{c_2 - \beta_0 - (1 + \beta_1)x_1\}\}} f_{\tilde{x}_2}(c_2 - \beta_0 - (1 + \beta_1)x_1) (1 + \beta_1) dx_1 \times f_{x_1}(c_1) \\ &+ \frac{\partial c_2}{\partial c_1} \int_{c_1}^{\infty} [1 - q_3 - F_{\tilde{y}}(c_3 - \gamma_0^* - \gamma_1^*x_1 - \gamma_2\{c_2 - \beta_0 - (1 + \beta_1)x_1\})] \\ &\times \frac{1}{1 + \exp\{-\varphi_0^* - \varphi_1^*x_1 - \varphi_2(c_2 - \beta_0 - (1 + \beta_1)x_1)\}} f_{\tilde{x}_2}(c_2 - \beta_0 - (1 + \beta_1)x_1) f_{x_1}(x_1) dx_1 \\ &= \int_0^{\infty} A(x_1) f_{\tilde{x}_2}(c_2 - \beta_0 - (1 + \beta_1)(-x_1 + c_1)) (1 + \beta_1) dx_1 \times f_{x_1}(c_1) \\ &+ \frac{\partial c_2}{\partial c_1} \int_0^{\infty} B(x_1) f_{\tilde{x}_2}(c_2 - \beta_0 - (1 + \beta_1)(x_1 + c_1)) f_{x_1}(x_1 + c_1) dx_1, \end{aligned} \quad (\text{A.9})$$

where

$$\begin{aligned} A(x_1) &= [1 - q_3 - F_{\tilde{y}}(c_3 - \gamma_0^* - \gamma_1^*c_1 - \gamma_2\{c_2 - \beta_0 - (1 + \beta_1)(-x_1 + c_1)\})] \\ &\quad \times \frac{1}{1 + \exp\{-\varphi_0^* - \varphi_1^*c_1 - \varphi_2\{c_2 - \beta_0 - (1 + \beta_1)(-x_1 + c_1)\}\}}, \\ B(x_1) &= [1 - q_3 - F_{\tilde{y}}(c_3 - \gamma_0^* - \gamma_1^*(x_1 + c_1) - \gamma_2\{c_2 - \beta_0 - (1 + \beta_1)(x_1 + c_1)\})] \\ &\quad \times \frac{1}{1 + \exp\{-\varphi_0^* - \varphi_1^*(x_1 + c_1) - \varphi_2\{c_2 - \beta_0 - (1 + \beta_1)(x_1 + c_1)\}\}}. \end{aligned}$$

Note that  $1 - q_3 - F_{\tilde{y}}(\cdot) > 0$  by the condition  $\Pr(y > c_3 \mid \delta = 1, x_1 > c_1, x_1 + x_2 > c_2) = q_3$ .

Thus,  $A(x) > 0$  and  $B(x) > 0$ . In addition, both  $1 - q_3 - F_{\tilde{y}}(\cdot)$  and  $\frac{1}{1 + \exp(\cdot)}$  are decreasing

functions. We then verify that

$$c_3 - \gamma_0^* - \gamma_1^* c_1 - \gamma_2 \{c_2 - \beta_0 - (1 + \beta_1)(-x_1 + c_1)\} \leq c_3 - \gamma_0^* - \gamma_1^* (x_1 + c_1) - \gamma_2 \{c_2 - \beta_0 - (1 + \beta_1)(x_1 + c_1)\},$$

if and only if  $\gamma_1 \leq \gamma_2(2 + \beta_1)$ . Similarly,

$$-\varphi_0^* - \varphi_1^* c_1 - \varphi_2 \{c_2 - \beta_0 - (1 + \beta_1)(-x_1 + c_1)\} \leq -\varphi_0^* - \varphi_1^* (x_1 + c_1) - \varphi_2 \{c_2 - \beta_0 - (1 + \beta_1)(x_1 + c_1)\},$$

if and only if  $\varphi_1 \leq \varphi_2(2 + \beta_1)$ . Thus,  $A(x) \geq B(x)$ . This together with (A.7) yields that (A.9) is larger than zero. As a result, we have  $\frac{\partial c_3}{\partial c_1} < 0$ .

Now we prove that the error rate function is increasing with respect to the cut-off  $c_1$ . It is straightforward to verify that the error function is proportional to  $\Pr(y > c_3) - \Pr(y > c_3, x_1 + x_2 > c_2, x_1 > c_1)$ . Similar to (A.8), it follows that

$$\begin{aligned} & \Pr(y > c_3) - \Pr(y > c_3, x_1 + x_2 > c_2, x_1 > c_1) \\ &= \int_{-\infty}^{\infty} \int_{-\infty}^{\infty} [1 - F_{\tilde{y}}(c_3 - \gamma_0^* - \gamma_1^* x_1 - \gamma_2 \tilde{x}_2)] f_{\tilde{x}_2}(\tilde{x}_2) f_{x_1}(x_1) d\tilde{x}_2 dx_1 \\ & \quad - \int_{c_1}^{\infty} \int_{c_2 - \beta_0 - (1 + \beta_1)x_1}^{\infty} [1 - F_{\tilde{y}}(c_3 - \gamma_0^* - \gamma_1^* x_1 - \gamma_2 \tilde{x}_2)] f_{\tilde{x}_2}(\tilde{x}_2) f_{x_1}(x_1) d\tilde{x}_2 dx_1. \end{aligned}$$

Taking derivatives with respect to  $c_1$ , we have

$$\begin{aligned} & - \frac{\partial c_3}{\partial c_1} \int \int_{\{x_1 < c_1\} \cup \{\tilde{x}_2 < c_2 - \beta_0 - (1 + \beta_1)x_1\}} f_{\tilde{y}}(c_3 - \gamma_0^* - \gamma_1^* x_1 - \gamma_2 \tilde{x}_2) f_{\tilde{x}_2}(\tilde{x}_2) f_{x_1}(x_1) d\tilde{x}_2 dx_1 \\ & + \left\{ \int_{c_2 - \beta_0 - (1 + \beta_1)c_1}^{\infty} [1 - F_{\tilde{y}}(c_3 - \gamma_0^* - \gamma_1^* c_1 - \gamma_2 \tilde{x}_2)] f_{\tilde{x}_2}(\tilde{x}_2) d\tilde{x}_2 \times f_{x_1}(c_1) \right. \\ & \left. + \frac{\partial c_2}{\partial c_1} \int_{c_1}^{\infty} [1 - F_{\tilde{y}}(c_3 - \gamma_0^* - \gamma_1^* x_1 - \gamma_2 \{c_2 - \beta_0 - (1 + \beta_1)x_1\})] f_{\tilde{x}_2}(c_2 - \beta_0 - (1 + \beta_1)x_1) f_{x_1}(x_1) dx_1 \right\}. \end{aligned}$$

By the result of (A.9), the second term is non-negative. This together with the result that  $\frac{\partial c_3}{\partial c_1} < 0$  yields that the error function is increasing with respect to  $c_1$ , thus decreasing for  $q_1$ .

For the general case  $\{\mathbf{x}^\top \boldsymbol{\theta} > c_2, x_1 > c_1\}$ , we can similarly show that the error rate  $\Pr(y > c_3 \mid \{x_1 < c_1\} \cup \{x_1 > c_1, \mathbf{x}^\top \boldsymbol{\theta} < c_2\})$  is increasing in  $c_1$  under conditions:  $\gamma_1 \leq \gamma_2(2\theta_1/\theta_2 + \beta_1)$  and  $\varphi_1 \leq \varphi_2(2\theta_1/\theta_2 + \beta_1)$ .
